# Supplementary material for: Non-Ventilated Patients with Spontaneous Pneumothorax or Pneumomediastinum Associated with COVID-19: Three-Year Debriefing across Five Pandemic Waves
Source: MDPI journal article supplement (doi:10.3390/jpm13101497), 2023-10-15
Supplement: s1 [file s1]

**Supplementary Table S1.** The most frequent symptoms and comorbidities observed in SP-SPM patients.

| Variable <sup>(a)</sup> |           | All waves<br>(N=190) | Wave 1<br>(N = 15) | Wave 2<br>(N = 32) | Wave 3<br>(N = 46) | Wave 4<br>(N = 29) | Wave 5<br>(N = 68) | p-value <sup>(b)</sup> |
|-------------------------|-----------|----------------------|--------------------|--------------------|--------------------|--------------------|--------------------|------------------------|
| Symptoms                |           |                      |                    |                    |                    |                    |                    |                        |
| Cough                   | +COVID-19 | 26 (40%)             | –                  | 11 (42.3%)         | 10 (38.5%)         | 2 (7.7%)           | 3 (11.5%)          | 0.007**                |
|                         | -COVID-19 | 39 (60%)             | 7 (17.9%)          | 5 (12.8%)          | 10 (25.6%)         | 4 (10.3%)          | 13 (33.3%)         |                        |
| Dyspnea                 | +COVID-19 | 40 (26.6%)           | –                  | 17 (42.5%)         | 14 (35%)           | 2 (5%)             | 7 (17.5%)          | <0.001**               |
|                         | -COVID-19 | 110 (73.4%)          | 15 (13.6%)         | 12 (10.9%)         | 24 (21.8%)         | 15 (13.6%)         | 44 (40%)           |                        |
| Chest pain              | +COVID-19 | 36 (30.3%)           | –                  | 15 (41.7%)         | 13 (36.1%)         | 2 (5.6%)           | 6 (16.7%)          | <0.001**               |
|                         | -COVID-19 | 83 (69.7%)           | 10 (12%)           | 10 (12%)           | 22 (26.5%)         | 11 (13.3%)         | 30 (36.1%)         |                        |
| Tiredness               | +COVID-19 | 28 (48.3%)           | –                  | 12 (42.9%)         | 10 (35.7%)         | 1 (3.6%)           | 5 (17.9%)          | 0.011*                 |
|                         | -COVID-19 | 30 (51.7%)           | 4 (13.3%)          | 6 (20%)            | 4 (13.3%)          | 3 (10%)            | 13 (42.3%)         |                        |
| Comorbidities           |           |                      |                    |                    |                    |                    |                    |                        |
| COPD                    | +COVID-19 | 6 (24%)              | –                  | 2 (33.3%)          | 1 (16.7%)          | -                  | 3 (50%)            | 0.307                  |
|                         | -COVID-19 | 19 (76%)             | 5 (26.3%)          | 2 (10.5%)          | 1 (5.3%)           | 3 (15.8%)          | 8 (42.1%)          |                        |
| Asthma                  | +COVID-19 | 7 (66.7%)            | –                  | 2 (28.6%)          | 3 (42.9%)          | -                  | 2 (28.6%)          | 0.757                  |
|                         | -COVID-19 | 4 (33.3%)            | –                  | 1 (25%)            | 1 (25%)            | -                  | 2 (50%)            |                        |
| Hypertension            | +COVID-19 | 26 (46.4%)           | –                  | 11 (42.3%)         | 10 (38.5%)         | -                  | 5 (19.2%)          | 0.011*                 |
|                         | -COVID-19 | 30 (53.6%)           | 3 (10%)            | 4 (13.3%)          | 7 (23.3%)          | 3 (10%)            | 13 (43.3%)         |                        |
| DM                      | +COVID-19 | 8 (50%)              | –                  | 2 (25%)            | 2 (25%)            | 1 (12.5%)          | 3 (37.5%)          | 1                      |
|                         | -COVID-19 | 8 (50%)              | –                  | 2 (25%)            | 2 (25%)            | 1 (12.5%)          | 3 (37.5%)          |                        |
| Obesity                 | +COVID-19 | 3 (33.3%)            | –                  | -                  | 2 (66.7%)          | 1 (33.3%)          | -                  | 0.392                  |
|                         | -COVID-19 | 6 (66.7%)            | –                  | 1 (16.7%)          | 1 (16.7%)          | 2 (33.3%)          | 2 (33.3%)          |                        |
| CKD                     | +COVID-19 | 6 (66.7%)            | –                  | 2 (33.3%)          | 3 (50%)            | 1 (16.7%)          | -                  | 0.741                  |
|                         | -COVID-19 | 3 (33.3%)            | –                  | 1 (33.3%)          | 2 (66.7%)          | -                  | -                  |                        |
| Active cancer           | +COVID-19 | 3 (16.7%)            | –                  | 2 (66.7%)          | -                  | -                  | 1 (33.3%)          | 0.355                  |
|                         | -COVID-19 | 15 (83.3%)           | 1 (6.7%)           | 2 (13.3%)          | 2 (13.3%)          | 2 (13.3%)          | 8 (53.3%)          |                        |

<sup>(a)</sup> Observed frequency (percent). Percentages: "All patients" column shows percentages based on the total number of patients presenting each symptom or comorbidity, all other columns show percentages based on the row total.

<sup>(b)</sup> Chi-square test (variables' distribution between COVID-19 and non-COVID-19 cases across pandemic waves).

\*, \*\* Statistical significance,  $p < 0.05$ ,  $p < 0.01$

**Supplementary Table S2.** Localization and extension of pneumothorax.

| Variable <sup>(a)</sup>   |           | All waves<br>(N = 190) | Wave 1<br>(N = 15) | Wave 2<br>(N = 32) | Wave 3<br>(N = 46) | Wave 4<br>(N = 29) | Wave 5<br>(N = 68) | p-value <sup>(b)</sup> |
|---------------------------|-----------|------------------------|--------------------|--------------------|--------------------|--------------------|--------------------|------------------------|
| Right pneumothorax        | +COVID-19 | 28 (25.5%)             | –                  | 11 (55%)           | 7 (24.1%)          | 2 (12.5%)          | 8 (19.5%)          | 0.488                  |
|                           | -COVID-19 | 82 (74.5%)             | 4 (100%)           | 9 (45%)            | 22 (75.9%)         | 14 (87.5%)         | 33 (80.5%)         |                        |
| Left pneumothorax         | +COVID-19 | 12 (18.2%)             | –                  | 5 (50%)            | 3 (25%)            | 1 (11.1%)          | 3 (13%)            | 0.038*                 |
|                           | -COVID-19 | 54 (81.8%)             | 12 (100%)          | 5 (50%)            | 9 (75%)            | 8 (88.9%)          | 20 (87%)           |                        |
| Extension of pneumothorax |           |                        |                    |                    |                    |                    |                    |                        |
| no pneumothorax           | +COVID-19 | 12 (54.5%)             | –                  | 3 (100%)           | 6 (85.7%)          | 1 (50%)            | 2 (20%)            | 0.004**                |
|                           | -COVID-19 | 10 (45.5%)             | –                  | -                  | 1 (14.3%)          | 1 (50%)            | 8 (80%)            |                        |
| < 10%                     | +COVID-19 | 12 (35.3%)             | –                  | 6 (75%)            | 1 (14.3%)          | 2 (40%)            | 3 (25%)            |                        |
|                           | -COVID-19 | 22 (64.7%)             | 2 (100%)           | 2 (25%)            | 6 (85.7%)          | 3 (60%)            | 9 (75%)            |                        |
| 10-50%                    | +COVID-19 | 17 (18.1%)             | –                  | 3 (30%)            | 5 (26.3%)          | 2 (11.1%)          | 7 (17.1%)          |                        |
|                           | -COVID-19 | 77 (81.9%)             | 6 (100%)           | 7 (70%)            | 14 (73.7%)         | 16 (88.9%)         | 34 (82.9%)         |                        |
| > 50%                     | +COVID-19 | 11 (27.5%)             | –                  | 6 (54.5%)          | 3 (23.1%)          | 1 (25%)            | 1 (20%)            |                        |
|                           | -COVID-19 | 29 (72.5%)             | 7 (100%)           | 5 (45.5%)          | 10 (76.9%)         | 3 (75%)            | 4 (80%)            |                        |

<sup>(a)</sup> Observed frequency (percent). Percentages: "All patients" column shows percentages based on the total number of patients presenting each symptom or comorbidity, all other columns show percentages based on the row total.

<sup>(b)</sup> Chi-square test (variables' distribution between COVID-19 and non-COVID-19 cases across pandemic waves).

\*, \*\* Statistical significance,  $p < 0.05$ ,  $p < 0.01$

**Supplementary Table S3.** Laboratory findings for COVID-19 patients and non-COVID-19 patients across pandemic waves.

| Variable <sup>(a)</sup>         |           | All waves<br>(N = 190) | Wave 1<br>(N = 14) | Wave 2<br>(N = 34)   | Wave 3<br>(N = 45)       | Wave 4<br>(N = 29)      | Wave 5<br>(N = 68)        | p-value <sup>(b)</sup> |
|---------------------------------|-----------|------------------------|--------------------|----------------------|--------------------------|-------------------------|---------------------------|------------------------|
| CRP<br>[mg/L]                   | +COVID-19 | 109.5<br>(63 – 172.9)  | –                  | 82.5<br>(31 – 146)   | 109<br>(78.6 – 146.79)   | 172.9<br>(70.1 – 202.5) | 155.05<br>(91.6 – 187.65) | 0.42                   |
|                                 | -COVID-19 | 55.9 (6.7 – 101.5)     | –                  | 10 (8.65 – 55.65)    | 51 (1 – 192)             | 5.1 (1.1 – 85.4)        | 18.34 (6.1 – 81.5)        | 0.973                  |
| CRT<br>[mg/dl]                  | +COVID-19 | 1.01 (0.85 – 1.34)     | –                  | 0.98 (0.76 – 1.04)   | 1.05 (0.92 – 1.36)       | 1.33 (1.2 – 2.3)        | 1.04 (0.9 – 1.14)         | 0.248                  |
|                                 | -COVID-19 | 0.81 (0.67 – 1.11)     | 0.89 (0.73 – 1.07) | 0.8 (0.62 – 1)       | 0.92 (0.8 – 1.13)        | 0.84 (0.67 – 0.94)      | 0.9 (0.75 – 1.16)         | 0.279                  |
| Urea<br>[mg/dl]                 | +COVID-19 | 49 (34 - 71)           | –                  | 39 (30 - 52)         | 62 (44.5 – 72.5)         | 85 (74 - 186)           | 42 (31 – 64.85)           | 0.033*                 |
|                                 | -COVID-19 | 35.8 (24 – 55.95)      | 32 (27.5 – 37.5)   | 29.5 (20 – 46)       | 32 (25 – 42)             | 31 (29 – 43)            | 34 (26 – 56)              | 0.868                  |
| WBC<br>[x10 <sup>3</sup> /μL]   | +COVID-19 | 9.75 (6.1 – 15.7)      | –                  | 9.6 (7.1 – 14.3)     | 7.9 (6.57 – 16.65)       | 6.1 (6 – 9.9)           | 14.15 (8.6 – 15.8)        | 0.334                  |
|                                 | -COVID-19 | 8.61 (7.39 – 11.9)     | 8.9 (8.1 – 12.3)   | 10.38 (7.8 – 17.3)   | 9.7 (8.6 – 12.6)         | 7.8 (6.8 – 10.7)        | 11.7 (8.9 – 13.67)        | 0.280                  |
| Lymph<br>[x10 <sup>3</sup> /μl] | +COVID-19 | 1 (0.7 – 1.3)          | –                  | 1.07 (0.7 – 1.67)    | 1 (0.68 – 1.2)           | 0.8 (0.6 - 1)           | 0.92 (0.75 – 1.35)        | 0.4                    |
|                                 | -COVID-19 | 1.7 (1.25 – 2.1)       | 1.9 (1.45 – 2.1)   | 1.87 (1.39 – 2.1)    | 2 (1.63 – 2.41)          | 1.91 (1.7 – 2.54)       | 1.8 (1.25 – 3.1)          | 0.847                  |
| PLT<br>[x10 <sup>3</sup> /μL]   | +COVID-19 | 242.5 (178 - 354)      | –                  | 242.5 (215 - 358)    | 172 (146.5 - 289)        | 238 (216 - 285)         | 388 (311 - 411)           | 0.038*                 |
|                                 | -COVID-19 | 281 (236.5 – 356)      | 314 (238 – 389.5)  | 300 (245 – 360)      | 261 ( 228 - 334)         | 243 (158 – 280)         | 264 (212 – 302)           | 0.161                  |
| D-dimer<br>[ng/ml]              | +COVID-19 | 1582.2<br>(932 - 2852) | –                  | 2284<br>(932 - 3620) | 1480<br>(998.5 – 2872.5) | 1250<br>(810 - 1570)    | 1965<br>(955 - 5780)      | 0.656                  |
|                                 | -COVID-19 | 2200<br>(830 - 3440)   | –                  | 1846<br>(552 – 6882) | 1540<br>(525 – 6882)     | 2020<br>(1217 – 3730)   | 2220<br>(690 – 3260)      | 0.753                  |
| GLI<br>[mg/dl]                  | +COVID-19 | 126 (105 -177)         | –                  | 126 (103 - 139)      | 124 (107.5 - 154)        | 186 (158 - 313)         | 133.5 (113 - 175)         | 0.446                  |
|                                 | -COVID-19 | 126 (97.5 – 134)       | 111 (95.5 – 126)   | 123 (99 – 146)       | 103 (94 – 131.5)         | 100.5 (97 – 118)        | 113 (99 – 133)            | 0.366                  |

<sup>(b)</sup>median (interquartile range),

<sup>(b)</sup>Kruskal-Wallis nonparametric test (separate for each row).

\* Statistical significance, p < 0.05.
